# Supplementary material for: FastMM: an efficient toolbox for personalized constraint-based metabolic modeling
Source: BMC Bioinformatics. 2020 Feb 21;21:67. doi: 10.1186/s12859-020-3410-4 (PMC7035665; doi:10.1186/s12859-020-3410-4)
Supplement: Supplementary file 1 — Additional file 1 Table S1. Comparison of the time cost of metabolic modeling between FastMM and other software using Gurobi solver. [file 12859_2020_3410_MOESM1_ESM.xlsx]

## Sheet: Table S1
Table S1. Comparison of the time cost of metabolic modeling between FastMM and other software using GUROBI solver
	COBRA 3.0	Cobrapy	fastFVA	Fast-SL	FastMM
FVA	$183 s	99 s	**85 s	\	***80 s
SingleGeneKO	19 s	15 s	\	21 s	9 s
DoubleGeneKO	118570 s	*2324 s	\	3161 s	260 s
SingleMetKO		\	\	\	8 s
DoubleMetKO		\	\	\	578 s
MCMC	2185 s	\	\	\	254 s
Note: The consistent general human metabolic model Recon 2.03 (5317 reaction, 2960 metabolites, and 2194 genes) was used in the analyses. The symbols of “s” represents seconds. MCMC sampling uses the parameter of points of 2000, and steps of 1000. All FastMM applications used one CPU cores, other software used default parameters. \: not available for the corresponding applications. $: COBRA 3.0 u…
